# Supplementary material for: A pedagogical approach to science outreach
Source: PLoS Biol. 2020 Apr 16;18(4):e3000650. doi: 10.1371/journal.pbio.3000650 (PMC7188294; doi:10.1371/journal.pbio.3000650)
Supplement: S2 Table — Of note, Bubble-ology has been performed in many museum settings to great delight, and “The Case of Missing Bunny” and “Chemistry and Our Health” are 2 series of 6 experiments adaptable in a wide array of settings including Alumni Weekend events for kids, science days at elementary schools, and After School Science Club. (XLSX) [file pbio.3000650.s002.xlsx]

## Sheet: Sheet1
Supplemental Table S2. Available Experiments through Chem13 News
Title	# of Experiments	Chemistry Topics	Link to Full Description
Miniature Whoosh Bottle Demonstration	1	Combustion	https://uwaterloo.ca/chem13-news-magazine/november-2012/activities/sharing-chemistry-community
Burning Steel Wool Demonstration	1	Combustion	https://uwaterloo.ca/chem13-news-magazine/december-2012-january-2013/activities/sharing-chemistry-community
Demystifying the Poly Density Bottle	1	Density of Liquids	https://uwaterloo.ca/chem13-news-magazine/march-2013/feature/demystifying-poly-density-bottle
Propane Bubbles	1	Combustion, Density of Gases	https://uwaterloo.ca/chem13-news-magazine/april-2013/activities/sharing-chemistry-community-propane-bubbles
Walking on Oobleck	1	Solids vs Liquids, Viscosity	https://uwaterloo.ca/chem13-news-magazine/september-2013/activities/sharing-chemistry-community-walking-oobleck
The Chemistry of US Currency and Magnetic Ink	1	Metals, Magnetism	https://uwaterloo.ca/chem13-news-magazine/october-2013/activities/chemistry-us-currency-magnetic-ink-sharing-chemistry
The Ramp of Science	1	Combustion, Density of Gases	https://uwaterloo.ca/chem13-news-magazine/november-2013/feature/sharing-chemistry-community-ramp-science
Polyurethane Foam Smoothies	1	Polymers	https://uwaterloo.ca/chem13-news-magazine/december-2013-january-2014/activities/sharing-chemistry-community
The Exploding Gummy Bear	1	Catalysts, metals	https://uwaterloo.ca/chem13-news-magazine/february-2014/activities/sharing-chemistry-community-exploding-gummy-bear
Follow Up to The Exploding Gummy Bear	1	(further description)	https://uwaterloo.ca/chem13-news-magazine/november-2014/activities/sharing-chemistry-community-follow
A Colorful Catalyst	1	pH	https://uwaterloo.ca/chem13-news-magazine/march-2014/activities/sharing-chemistry-community-colorful-catalyst
Molding a Thermoplastic	1	Polymers, Solids	https://uwaterloo.ca/chem13-news-magazine/april-2014/activities/molding-thermoplastic
How to Blow Out a Light Bulb	1	Acid/Base, Dissociation, Precipitates, Le Chatelier's principle of chemical equilibrium	https://uwaterloo.ca/chem13-news-magazine/october-2014/activities/sharing-chemistry-community
The Case of the Missing Bunny – “Maddy"	6	CSI type activity - viscosity, reactivity of the solid, chemiluminescence, paper chromotagraphy, fabric dying, precipitation	https://uwaterloo.ca/chem13-news-magazine/december-2014-january-2015/activities/sharing-chemistry-community
“Elephant’s Toothpaste” The Catalytic Decomposition of Hydrogen Peroxide	1	exothermic reactions, decomposition, catalysis	https://uwaterloo.ca/chem13-news-magazine/march-2015/activities/sharing-chemistry-community-elephants-toothpaste
Bubble-ology Part 1	1	density, structure of soap molecules, surface tension	https://uwaterloo.ca/chem13-news-magazine/april-2015/activities/bubble-ology-part-1
Bubble-ology Part 2	1	density, structure of soap molecules, surface tension	https://uwaterloo.ca/chem13-news-magazine/may-2015/activities/sharing-chemistry-community-bubble-ology-part-2
“C” the Difference	1	starch, oxidation-reduction reacttions	https://uwaterloo.ca/chem13-news-magazine/september-2015/activities/sharing-chemistry-community-c-difference
Chemistry and our Health	6	pH, chemical nature of solutions, neutralization reactions and precipitation	https://uwaterloo.ca/chem13-news-magazine/october-2015/activities/sharing-chemistry-community-chemistry-and-our-health
The Solubility and Alkalinity of Ammonia	1	pH	https://uwaterloo.ca/chem13-news-magazine/november-2015/feature/sharing-chemistry-community-solubility-and-alkalinity
Limiting and Excess Reagents	1	Stoichiometry	https://uwaterloo.ca/chem13-news-magazine/december-2015-january-2016/activities/sharing-chemistry-community-limiting-and-excess-reagents
Chemical Sunset	1	Tyndall Effect, colloids	https://uwaterloo.ca/chem13-news-magazine/february-2016/activities/sharing-chemistry-community-chemical-sunset
The Chemistry of Color – Chemical Rainbow	1	pH	https://uwaterloo.ca/chem13-news-magazine/march-2016/activities/chemical-rainbow
Now You Don't (See It!) Now You Do!	1	oxidation-reduction, reaction order, rate of a reaction, limiting/excess reagents	https://uwaterloo.ca/chem13-news-magazine/april-2016/activities/sharing-chemistry-community-now-you-dont-see-it-now-you-do
Battle of the Blues	1	complex ions, Lewis acids and bases	https://uwaterloo.ca/chem13-news-magazine/may-2016/activities/sharing-chemistry-community-battle-blues
Gak Attack	1	polymers, non-newtonian fluids	https://uwaterloo.ca/chem13-news-magazine/october-2016/activities/gak-attack
Buffered vs a Non-Buffered Solution	1	Buffered solutions, strong vs weak acids/bases, pH	https://uwaterloo.ca/chem13-news-magazine/december-2016-january-2017/feature/buffered-vs-non-buffered-solution
Once in a Blue Moon	1	pH, rate of reaction, scattering of light	https://uwaterloo.ca/chem13-news-magazine/october-2018/feature/once-blue-moon
